# Supplementary material for: A 1D/2D Bi2O3/g-C3N4 step-scheme photocatalyst to activate peroxymonosulfate for the removal of tetracycline hydrochloride: insight into the mechanism, reactive sites, degradation pathway and ecotoxicity
Source: Royal Society of Chemistry journal article supplement (doi:10.1039/d3cp00495c), 2023-01-01
Supplement: d3cp00495c1.pdf [file d3cp00495c1.pdf]

## Supporting Information

### **1D/2D Bi<sub>2</sub>O<sub>3</sub>/g-C<sub>3</sub>N<sub>4</sub> step-scheme photocatalyst to active peroxymonosulfate for removal of tetracycline hydrochloride: insight into the mechanism, reactive sites, degradation pathway and ecotoxicity**

Mingyang Long,<sup>a</sup> Di Li,<sup>\*a</sup> Qianqian Zhao,<sup>a</sup> Hongmiao Li,<sup>a</sup> Qi Wen,<sup>a</sup> Li Wang,<sup>b</sup> Lei Wu,<sup>a</sup> Fang Song<sup>c</sup> and Jun Zhou<sup>a</sup>

<sup>a</sup> School of Chemistry and Chemical Engineering, Xi'an University of Architecture and Technology, Xi'an, 710055, China

<sup>b</sup> School of Environmental and Municipal Engineering, Xi'an University of Architecture and Technology, Xi'an, 710055, China

<sup>c</sup> Instrument Analysis Center, Xi'an University of Architecture and Technology, Xi'an, 710055, China

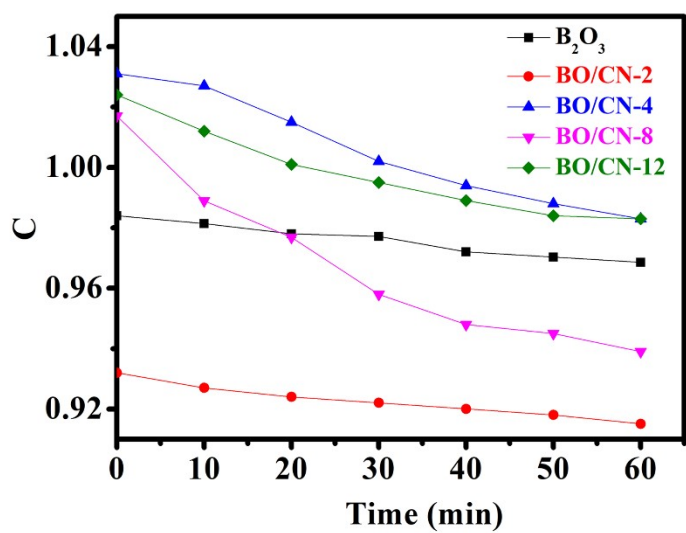

**Fig. 1** The photocatalytic degradation of TC with Bi<sub>2</sub>O<sub>3</sub> and BO/CN ([photocatalyst] = 0.5 g/L, [TC] = 40 mg/L).

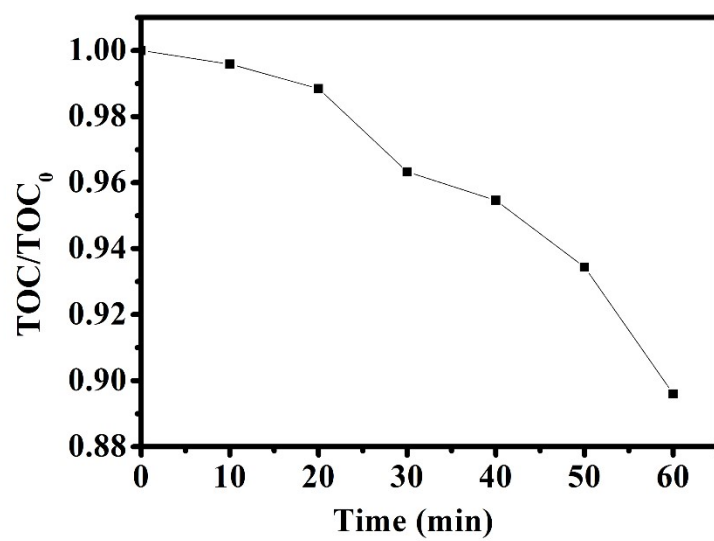

**Fig. 2** TOC removal plots of the BO/CN-8 under visible light irradiation ([photocatalyst] = 0.5 g/L, [TC] = 40 mg/L).

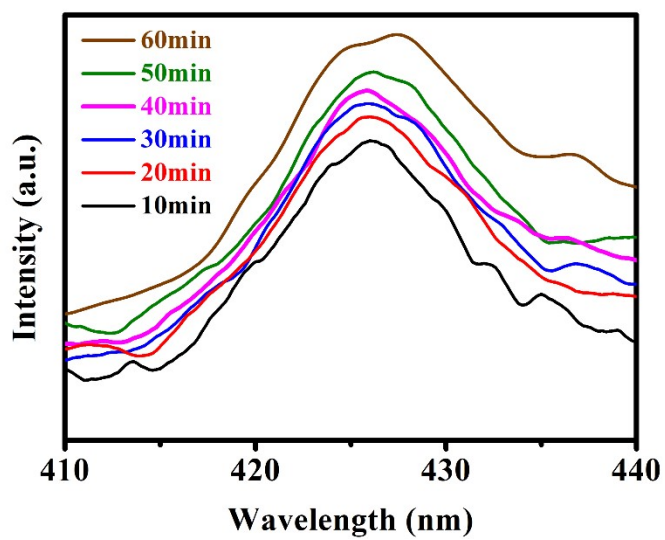

**Fig. 3** The fluorescence spectra changes (BO/CN-8 suspension containing 4 mM disodium terephthalate after various irradiation periods).

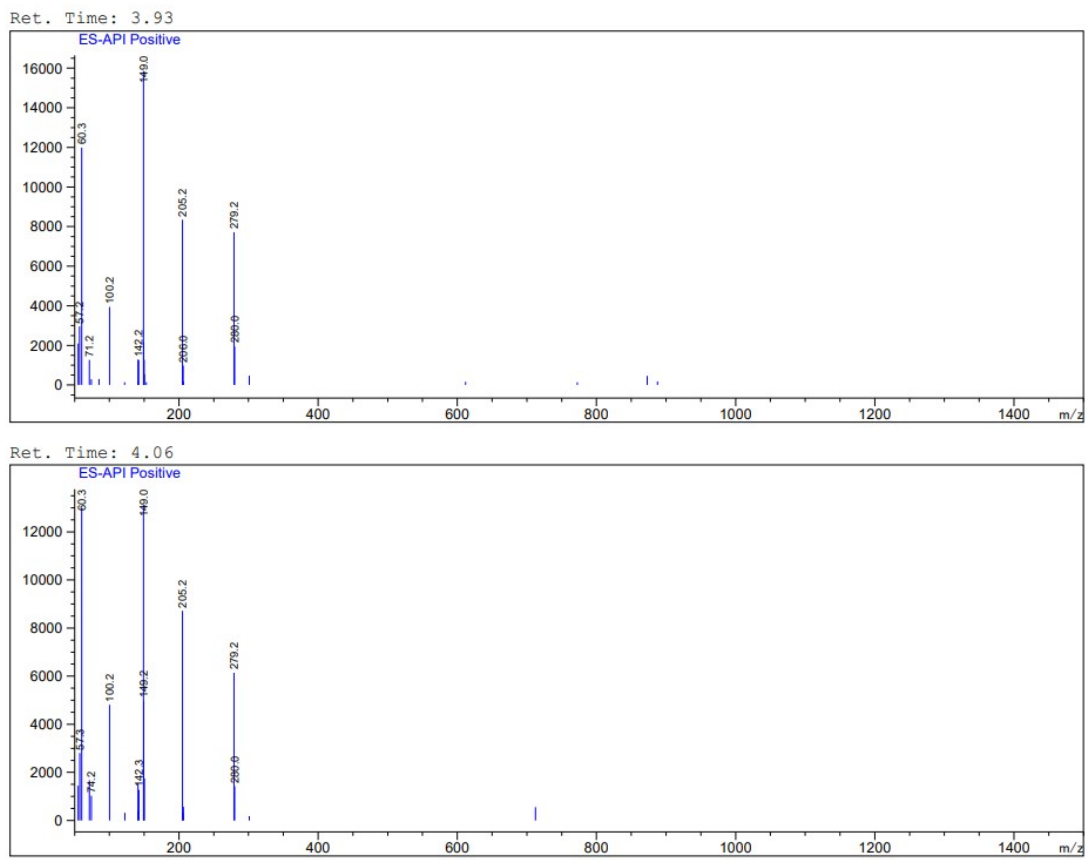

**Fig. 4** UPLC–MS results of TC degradation products [BO/CN-8: 0.5 g L<sup>-1</sup>; PMS: 2 mM; TC: 40 mg L<sup>-1</sup>].

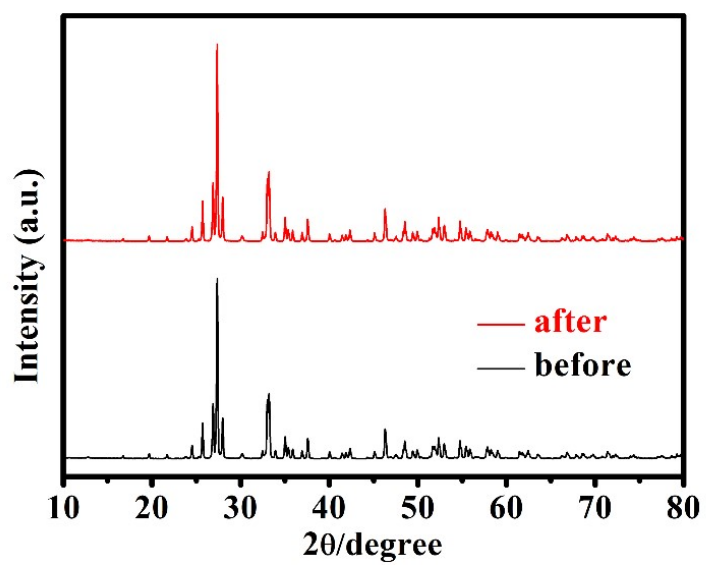

Fig. 5 XRD pattern of BO/CN-8 before and after reaction.

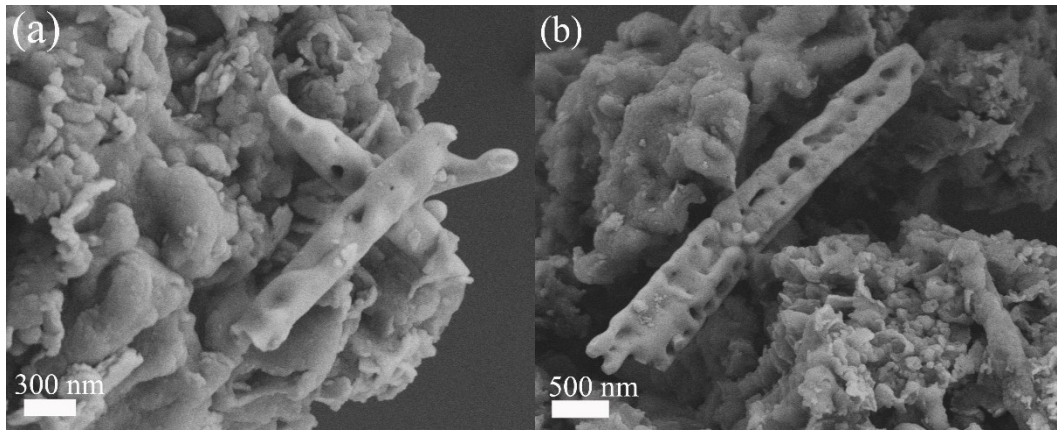

**Fig. 6** SEM images of BO/CN-8 before and after reaction.

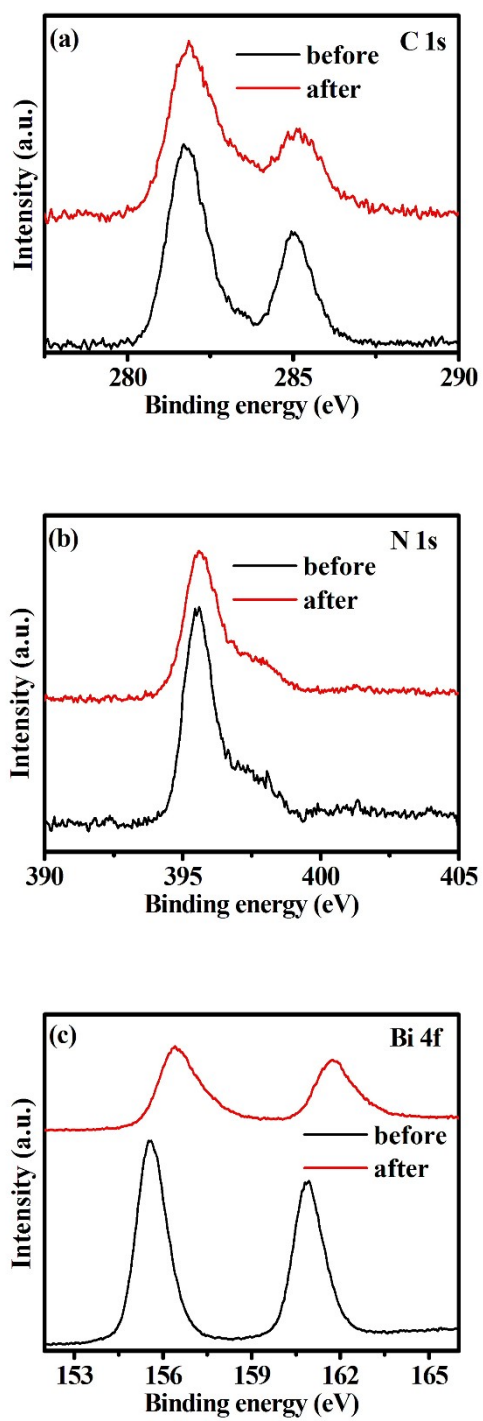

**Fig. 7** XPS spectra of BO/CN-8 before and after reaction.
